# Supplementary material
Source: PubMed Central journal article supplement (PMC3127689)
Supplement: supp_77_13_4383__1.pdf [file supp_77_13_4383__1.pdf]

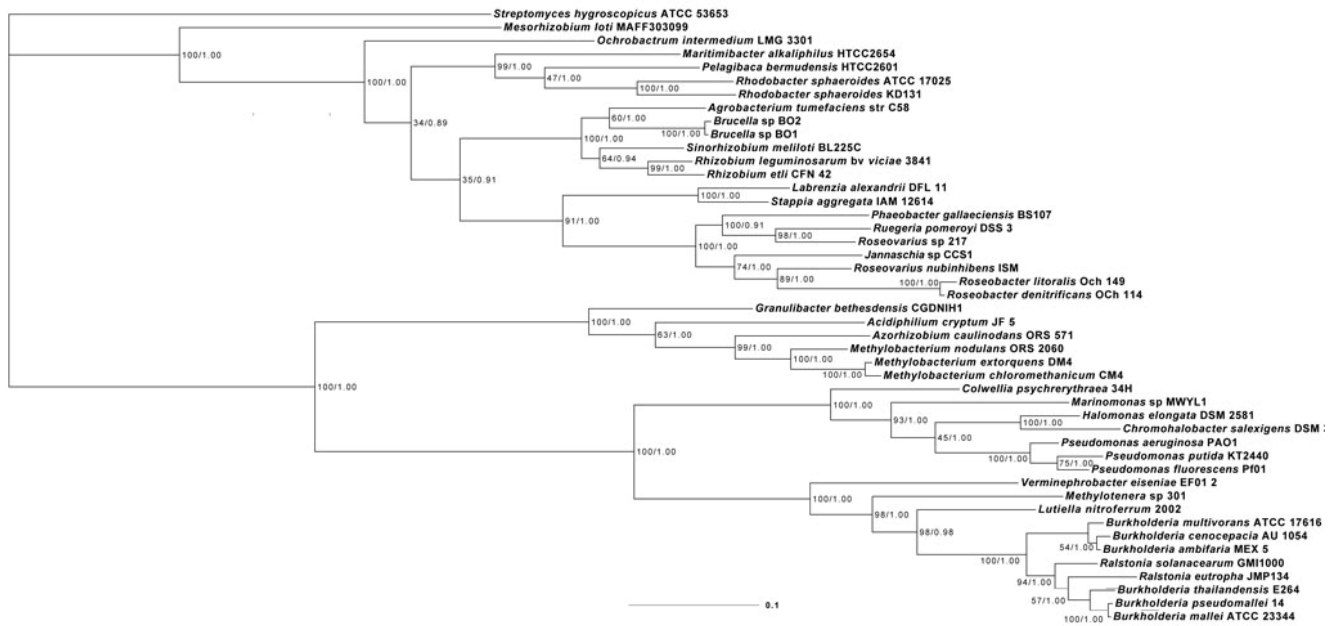

**Supplemental Figure 1:** The predicted amino acid sequence for homologues of the *dgc* genes in a select set of proteobacteria were aligned and analyzed as described in the methods section. Bootstrap (BS; for Maximum Parsimony) and posterior probability (PP; for Bayesian) support values are indicated at each node (BS/PP).
